# Supplementary material
Source: Springer Nature journal article supplement (https://www.springermedizin.de/resource/supplementary/12937_2006_146_MOESM6_ESM.doc/25654496)
Supplement: MOESM6 [file 25654496]

|  |  | **Young (18-30 yrs)** | | **Older (≥50 yrs)** | |
| --- | --- | --- | --- | --- | --- |
|  |  | **Abstain** | **Red wine** | **Abstain** | **Red Wine** |
| **Age (yrs)** |  | 21.7±0.3 | 21.3±0.4 | 58.9±2.3 | 57.2±2.7 |
| **BMI (kg/m2)** |  | 24.7±1.5 | 23.6±1.2 | 32.5±2.2 | 28.3±2.2 |
|  |  |  |  |  |  |
| **Cholesterol** |  |  |  |  |  |
| **(mmol/L)** | *Pre Sample* | 4.3±0.2 | 5.1±0.5 | 5.9±0.3 | 7.0±0.2 |
|  | *Post Sample* | 3.2±0.4 | 5.1±0.1 | 5.8±0.3 | 7.2±0.2 |
| **Triglycerides** |  |  |  |  |  |
| **(mmol/L)** | *Pre Sample* | 1.7±0.1 | 1.96±0.2 | 2.3±0.2 | 2.1±0.1 |
|  | *Post Sample* | 1.8±0.1 | 2.3±0.1 | 2.5±0.1 | 2.4±0.2 |
| **HDL-Cholesterol** |  |  |  |  |  |
| **(mg/dL)** | *Pre Sample* | 31.3±1.6 | 33.6±2.4 | 46.3±3.4 | 42.1±2.4 |
|  | *Post Sample* | 37.1±2.6 | 32.5± 2.4 | 44.3±1.5 | 41.9±1.9 |
| **LDL-Cholesterol** |  |  |  |  |  |
| **(mg/dL)** | *Pre Sample* | 137.5± 10.6 | 115.1±8.2 | 194.8±10.4 | 230.1±11.5 |
|  | *Post Sample* | 108.0±11.1 | 131.9±8.8 | 185.9±10.4 | 225.5±12.8 |
| **Glucose** |  |  |  |  |  |
| **(mmol/L)** | *Pre Sample* | 5.8±0.3 | 6.1±0.4 | 6.6±0.5 | 6.2±0.3 |
|  | *Post Sample* | 5.8±0.3 | 6.1±0.5 | 6.4±0.46 | 6.5±0.5 |
